# Supplementary material
Source: publisher site journal article supplement (https://www.dovepress.com/article/426411)
Supplement: Supplementary file 1 [file Additional_File_3_List_of_participating_sites.pdf › Additional_File_3_List_of_participating_sites.pdf]

### **Additional file 3 – List of participating clinical trial sites in the survey**

---

Associação Lusófona para o Desenvolvimento da investigação e Ensino em Ciências da Saúde (ALIES)

---

Associação para Investigação Biomédica e Inovação em Luz e Imagem (AIBILI)

---

Associação para Investigação e Desenvolvimento da Faculdade de Medicina da Universidade de Lisboa (AIDFM)

---

BlueClinical – Unidade de Fase I

---

Campus Neurológico Sénior (CNS)

---

Centro Cirúrgico de Coimbra

---

Centro de Electroencefalografia e Neurofisiologia Clínica (CENC)

---

Centro de Investigação em Tecnologias e Serviços de Saúde (CINTESIS)

---

Centro de Medicina de Reabilitação da Região Centro - Rovisco Pais

---

Centro de Medicina de Reabilitação de Alcoitão

---

Centro Hospitalar de Entre o Douro e Vouga, E.P.E.

---

Centro Hospitalar de Lisboa Ocidental, E.P.E.

---

Centro Hospitalar de Setúbal, E.P.E.

---

Centro Hospitalar de Vila Nova de Gaia/Espinho, E.P.E.

---

Centro Hospitalar do Baixo Vouga, E.P.E.

---

Centro Hospitalar do Oeste, E.P.E.

---

Centro Hospitalar e Universitário de Coimbra, E.P.E.

---

Centro Hospitalar Leiria, E.P.E.

---

Centro Hospitalar Médio Tejo, EPE

---

Centro Hospitalar Universitário Cova da Beira, E.P.E.

---

Centro Hospitalar Universitário de Lisboa Norte, E.P.E. (CIC-CAML)

---

Centro Hospitalar Universitário de S. João, E.P.E.

---

Centro Hospitalar Universitário do Algarve, EPE

---

Centro Hospitalar Universitário do Porto, E.P.E.

---

---

Centro Hospitalar Universitário Lisboa Central, E.P.E.

---

Clínica DaVita Cascais

---

Clínica DaVita Leiria

---

Clínica IVI Lisboa

---

Coimbra Institute for Biomedical Imaging and Translational Research – Instituto de Ciências Nucleares Aplicadas à Saúde (CIBIT–ICNAS)

---

Comprehensive Health Research Centre (CHRC)

---

Espaço Médico de Coimbra

---

Hospitais CUF

---

Hospitais Lusíadas Saúde

---

Hospitais Luz Saúde

---

Hospital da Senhora da Oliveira Guimarães, E.P.E.

---

Hospital de Braga, E.P.E. (2CA-Braga)

---

Hospital de Vila Franca de Xira

---

Hospital Distrital de Santarém, E.P.E.

---

Hospital Particular do Algarve

---

Hospital Professor Doutor Fernando Fonseca, E.P.E.

---

Hospital Santa Maria Maior, E.P.E. – Barcelos

---

Instituto Português de Oncologia de Lisboa Francisco Gentil, E.P.E.

---

NephroCare, Associação Protectora dos Diabéticos de Portugal (APDP)

---

Unidade Local de Saúde de Castelo Branco, E.P.E.

---

Unidade Local de Saúde de Matosinhos, E.P.E.

---

Unidade Local de Saúde do Alto Minho, E.P.E.

---
